# Supplementary material for: Assessing the plasmonics of gold nano-triangles with higher order laser modes
Source: publisher site journal article supplement (doi:10.3762/bjnano.3.77), 2012-10-04
Supplement: Additional file 1 [file 2190-4286-3-77-S1.pdf]

## Supporting Information

for

### Assessing the plasmonics of gold nano-triangles with higher order laser modes

Laura E. Hennemann<sup>1</sup>, Andreas Kolloch<sup>2</sup>, Andreas Kern<sup>1</sup>, Josip Mihaljevic<sup>1</sup>, Johannes Boneberg<sup>2</sup>, Paul Leiderer<sup>2</sup>, Alfred J. Meixner<sup>1</sup> and Dai Zhang<sup>\*1</sup>

Address: <sup>1</sup>Institute of Physical and Theoretical Chemistry, University of Tübingen, Auf der Morgenstelle 15, 72076 Tübingen, Germany and <sup>2</sup>Department of Physics, University of Konstanz, Universitätsstrasse 10, 78457 Konstanz, Germany

Email: Dai Zhang - dai.zhang@uni-tuebingen.de

\* Corresponding author

SERS and Raman spectra of adenine molecules

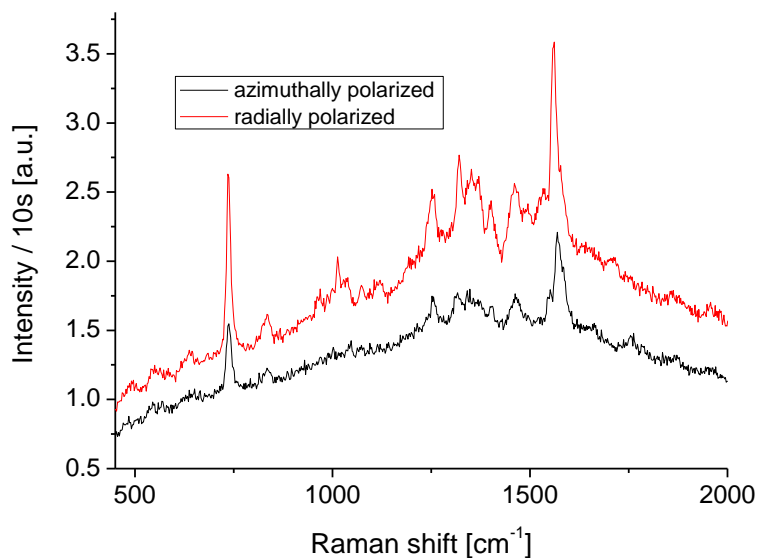

**Figure S1:** SERS spectra of adenine molecules adsorbed on a gold Fischer pattern ( $L \approx 350$  nm, glass substrate). The black spectrum was collected through excitation with an azimuthally polarised laser beam. The red spectrum was collected through excitation with a radially polarised laser beam.

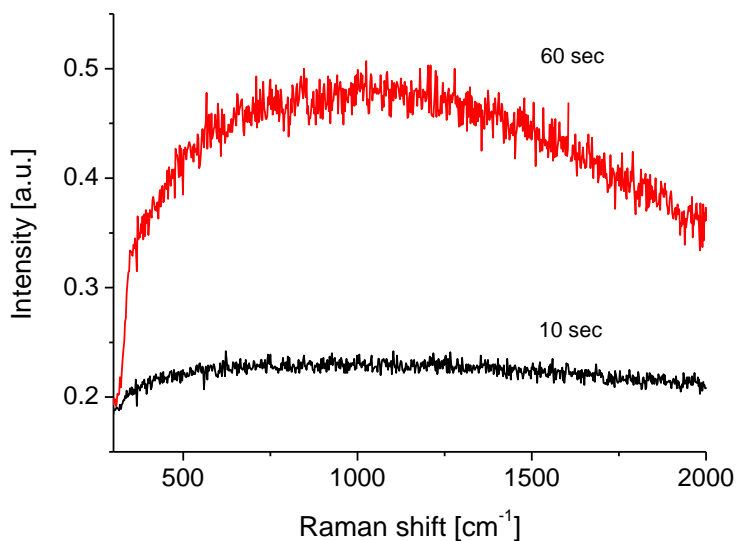

**Figure S2:** Raman spectra of adenine molecules adsorbed on a gold thin film using two different integration times. No obvious Raman peaks are observable due to the extremely low coverage with molecules. Both spectra were collected in radial donut mode.
